# Supplementary material for: Validation of the Fitbit Charge 2 compared to the ActiGraph GT3X+ in older adults with knee osteoarthritis in free-living conditions
Source: PubMed Central journal article supplement (PMC6353569; doi:10.1371/journal.pone.0211231), 2019-01-30
Supplement: pone.0211231.s002.pdf [file pone.0211231.s002.pdf]

Date Completed: \_\_\_\_ / \_\_\_\_ / \_\_\_\_ (MM/DD/YY)

To be completed by the **study participant**.

This questionnaire asks you about your medication and medical condition history. Please answer every question. Fill in only one answer per question unless instructed otherwise.

**A. MEDICATION INFORMATION****1.** In the **past week**, did you take any medication(s) for your knee pain?0  No      1  Yes**1a.** If "Yes", are you taking...**I. Acetaminophen (Tylenol, Panadol)?**0  No      1  Yes**II. Non-steroidal anti-inflammatory drugs (NSAIDs)?**0  No      1  Yes →**1. Please check the one(s) you took:**

- 1  Aspirin (Bayer, Excedrin, Bufferin)
- 2  Ibuprofen (Advil, Motrin, Nuprin)
- 3  Naproxen (Aleve, Naprosyn, Vimovo)
- 4  Ketoprofen (Actron, Orudis)
- 5  Diclofenac (Voltaren)
- 6  Celecoxib (Celebrex)
- 7  Nabumetone (Relafen)
- 8  Oxaprozin (Daypro, Dayrun, Duraprox)
- 9  Etodolac (Lodine, Lodine XL)
- 10  Meloxicam (Mobic)
- 11  Other. Please specify:

**III. Opioids?**0  No      1  Yes →**1. Please check the one(s) you took:**

- 0  Oxycodone (OxyContin, Oxecta, Roxicodone)
- 1  Oxycodone/Acetaminophen (Percocet, Endocet, Roxicet)
- 2  Tramadol
- 3  Hydrocodone (Hysingla ER, Zohydro ER)
- 4  Hydrocodone/Acetaminophen (Lorcet, Lortab, Norco, Vicodin)
- 5  Codeine
- 6  Hydromorphone (Dilaudid, Exalgo)
- 7  Methadone (Dolophine, Methadose)
- 8  Meperidine (Demerol)
- 9  Fentanyl (Antiq, Duragesic, Fentora)
- 10  Other. Please specify:

2. Other than vitamins or supplements, are you currently taking other medications?

0  No      1  Yes

2a. If "Yes", please list the medications you took in the **past week**:

|  |  |
|--|--|
|  |  |
|  |  |
|  |  |

| B. MEDICAL HISTORY                                                                                                                                                                                                                                                                                                                                                                                                                                                                                                                                                                                  | No                                                                                                    | Yes                                                                                                   |
|-----------------------------------------------------------------------------------------------------------------------------------------------------------------------------------------------------------------------------------------------------------------------------------------------------------------------------------------------------------------------------------------------------------------------------------------------------------------------------------------------------------------------------------------------------------------------------------------------------|-------------------------------------------------------------------------------------------------------|-------------------------------------------------------------------------------------------------------|
| <p><b>3a.</b> Have you ever been told by a medical professional that you have high blood pressure?</p> <p style="margin-left: 20px;"><b>I.</b> In the <b>past week</b>, have you taken medication to control your blood pressure?</p> <p style="margin-left: 40px;">If "Yes", please specify the medication(s):</p> <p style="margin-left: 40px;">_____</p> <p style="margin-left: 40px;">_____</p>                                                                                                                                                                                                 | <p>0 <input type="checkbox"/></p> <p>0 <input type="checkbox"/></p>                                   | <p>1 <input type="checkbox"/></p> <p>1 <input type="checkbox"/></p>                                   |
| <p><b>3b.</b> Have you ever been told by a medical professional that you had <i>congestive heart failure</i>?</p>                                                                                                                                                                                                                                                                                                                                                                                                                                                                                   | <p>0 <input type="checkbox"/></p>                                                                     | <p>1 <input type="checkbox"/></p>                                                                     |
| <p><b>3c.</b> Have you ever been told by a medical professional that you had a <i>heart attack</i>?</p>                                                                                                                                                                                                                                                                                                                                                                                                                                                                                             | <p>0 <input type="checkbox"/></p>                                                                     | <p>1 <input type="checkbox"/></p>                                                                     |
| <p><b>3d.</b> Have you ever undergone coronary artery bypass surgery (CABG)?</p>                                                                                                                                                                                                                                                                                                                                                                                                                                                                                                                    | <p>0 <input type="checkbox"/></p>                                                                     | <p>1 <input type="checkbox"/></p>                                                                     |
| <p><b>3e.</b> Have you ever had a procedure to unblock vessels in your heart, such as coronary stenting or an angioplasty?</p>                                                                                                                                                                                                                                                                                                                                                                                                                                                                      | <p>0 <input type="checkbox"/></p>                                                                     | <p>1 <input type="checkbox"/></p>                                                                     |
| <p><b>3f.</b> Have you ever been told by a medical professional that you had a <i>stroke</i>?</p>                                                                                                                                                                                                                                                                                                                                                                                                                                                                                                   | <p>0 <input type="checkbox"/></p>                                                                     | <p>1 <input type="checkbox"/></p>                                                                     |
| <p><b>3g.</b> Have you ever been told by a medical professional that you have <i>diabetes</i>?</p> <p style="margin-left: 20px;"><b>I.</b> In the <b>past week</b>, have you taken <i>insulin injections</i> to control your diabetes?</p> <p style="margin-left: 20px;"><b>II.</b> In the <b>past week</b>, have you taken <i>pills or other medications</i> to control your diabetes?</p> <p style="margin-left: 40px;">If "Yes" to a <i>diabetes treatment</i>, please specify the medication name(s) below:</p> <p style="margin-left: 40px;">_____</p> <p style="margin-left: 40px;">_____</p> | <p>0 <input type="checkbox"/></p> <p>0 <input type="checkbox"/></p> <p>0 <input type="checkbox"/></p> | <p>1 <input type="checkbox"/></p> <p>1 <input type="checkbox"/></p> <p>1 <input type="checkbox"/></p> |

To be completed by the **research assistant**.

| <b>C. PARTICIPANT INFORMATION</b>                                                      |                                 |
|----------------------------------------------------------------------------------------|---------------------------------|
| <b>1. Age:</b>                                                                         |                                 |
| a. Month of Birth (MM): _____                                                          |                                 |
| b. Year of Birth (YYYY): _____                                                         |                                 |
| <b>2. Sex:</b>                                                                         |                                 |
| 0 <input type="checkbox"/> Female                                                      |                                 |
| 1 <input type="checkbox"/> Male                                                        |                                 |
| <b>3. Height:</b>                                                                      |                                 |
| a. _____ ft.                                                                           |                                 |
| b. _____ in.                                                                           |                                 |
| <b>4. Weight:</b> _____ lbs.                                                           |                                 |
| <b>5. 30-Step Walk Length Results (in inches):</b><br><i>Use half-inch increments.</i> |                                 |
| a. 1 <sup>st</sup> Walk: _____ in.                                                     | 2 <sup>nd</sup> Walk: _____ in. |
