# Supplementary material for: Validation of the Fitbit Charge 2 compared to the ActiGraph GT3X+ in older adults with knee osteoarthritis in free-living conditions
Source: PubMed Central journal article supplement (PMC6353569; doi:10.1371/journal.pone.0211231), 2019-01-30
Supplement: pone.0211231.s004.pdf [file pone.0211231.s004.pdf]

## Post-Study Satisfaction Survey

ActiGraph and Fitbit Wear

January 10, 2017

Today's date : \_\_\_\_ / \_\_\_\_ / \_\_\_\_\_ (MM/DD/YYYY)

### A. VISIT INFORMATION

1. Did you find the **Fitbit** easy to wear on your **wrist**?

0  No

1  Yes

If *no*, what made the device difficult to wear?

2. Were the instructions for how to wear the **Fitbit** on your **wrist** clear?

0  No

1  Yes

If *no*, what can we do to make the instructions more clear?

3. Did you experience any discomfort wearing the **Fitbit**?

0  No

1  Yes

If *yes*, please describe:

4. Did you find the **ActiGraph** easy to wear on your **wrist**?

0  No

1  Yes

If *no*, what made the device difficult to wear?

5. Were the instructions for how to wear the **ActiGraph** on your **wrist** clear?

0  No

1  Yes

If *no*, what can we do to make the instructions more clear?

6. Did you experience any discomfort while wearing the **Actigraph** on your **wrist**?

0  No

1  Yes

If *yes*, please describe:

## Post-Study Satisfaction Survey

ActiGraph and Fitbit Wear

January 10, 2017

7. Did you find the **ActiGraph** easy to wear on your **waist**?

0  No

1  Yes

If *no*, what made the device difficult to wear?

8. Were the instructions for how to wear the **ActiGraph** on your **waist** clear?

0  No

1  Yes

If *no*, what can we do to make the instructions more clear?

9. Did you experience any discomfort while wearing the **Actigraph** on your **waist**?

0  No

1  Yes

If *yes*, please describe:

10. Were you satisfied with communication with the study staff?

0  No

1  Yes

11. Overall, were you satisfied with your participation in the study?

0  No

1  Yes

12. Is there anything study staff could have done to improve your experience?
